# Supplementary material for: Genome-scale community modelling reveals conserved metabolic cross-feedings in epipelagic bacterioplankton communities
Source: PubMed Central journal article supplement (PMC10978986; doi:10.1038/s41467-024-46374-w), 2024-03-28
Supplement: 41467_2024_46374_MOESM4_ESM.pdf [file 41467_2024_46374_MOESM4_ESM.pdf]

1 **Genome-scale community modelling reveals conserved**  
2 **metabolic cross-feedings in epipelagic bacterioplankton**  
3 **communities**

4  
5 Nils Giordano<sup>1#</sup>, Marinna Gaudin<sup>1,2#</sup>, Camille Trottier<sup>1</sup>, Erwan Delage<sup>1</sup>, Charlotte Nef<sup>2,3</sup>, Chris  
6 Bowler<sup>2,3</sup> and Samuel Chaffron<sup>1,3\*</sup>

7 <sup>1</sup> Nantes Université, École Centrale Nantes, CNRS, LS2N, UMR 6004, F-44000 Nantes, France.

8 <sup>2</sup> Institut de Biologie de l'École Normale Supérieure (IBENS), École Normale Supérieure, CNRS, INSERM,  
9 PSL Université Paris, F-75016 Paris, France.

10 <sup>3</sup> Research Federation for the Study of Global Ocean Systems Ecology and Evolution, FR2022/Tara Oceans  
11 GOSEE, F-75016 Paris, France.

12 #These authors contributed equally to this work.

13 \* Contact: [samuel.chaffron@cnrs.fr](mailto:samuel.chaffron@cnrs.fr)

14  
15 **Description of Additional Supplementary Files**

16 **Supplementary data legends:**

17 **File name:** Supplementary Data 1

18 **Description:** List of all genomes (WGS, MAG, SAG) included in the study.

19 **File name:** Supplementary Data 2

20 **Description:** Genome summary statistics.

21 **File name:** Supplementary Data 3

22 **Description:** Scaling law-based comparative statistics for genome types.

23 **File name:** Supplementary Data 4

24 **Description:** Tara Oceans samples contextual parameters (metadata).

25 **File name:** Supplementary Data 5

26 **Description:** Principal Coordinates Analyses correlative statistics.

27 **File name:** Supplementary Data 6

28 **Description:** Scaling law-based comparative statistics for (co-)active genomes.

29 **File name:** Supplementary Data 7

30 **Description:** List of predicted metabolic exchanges in each co-active community.

31 **File name:** Supplementary Data

32 **Description:** Statistics of predicted metabolic exchanges in each co-active community type.
